# Supplementary material for: Blood Count Recovery Following Induction Therapy for Acute Myeloid Leukemia in Children Does Not Predict Survival
Source: MDPI journal article supplement (doi:10.3390/cancers14030616), 2022-01-26
Supplement: s1 [file s1]

**Table S1: Patient characteristics by count recovery**

[illegible]

|                                                       |      |               |      |               |      |             |      |              |      |              |       |
|-------------------------------------------------------|------|---------------|------|---------------|------|-------------|------|--------------|------|--------------|-------|
| <100,00/ $\mu$ L                                      | 1359 | 82.7%         | 1065 | 82.4%         | 97   | 79.5%       | 119  | 88.1%        | 78   | 82.1%        | 0.290 |
| $\geq$ 100,00/ $\mu$ L                                | 285  | 17.3%         | 227  | 17.6%         | 25   | 20.5%       | 16   | 11.9%        | 17   | 17.9%        |       |
| <b>Race</b>                                           |      |               |      |               |      |             |      |              |      |              |       |
| Non-African American                                  | 1292 | 87.8%         | 1011 | 87.6%         | 99   | 90.8%       | 114  | 89.1%        | 68   | 85.0%        | 0.626 |
| African American                                      | 179  | 12.2%         | 143  | 12.4%         | 10   | 9.2%        | 14   | 10.9%        | 12   | 15.0%        |       |
| <b>MRD at EO11</b>                                    |      |               |      |               |      |             |      |              |      |              |       |
| Negative                                              | 1340 | 81.5%         | 1065 | 82.4%         | 97   | 79.5%       | 110  | 80.9%        | 68   | 71.6%        | 0.063 |
| Positive                                              | 305  | 20.7%         | 227  | 19.7%         | 25   | 22.9%       | 26   | 20.3%        | 27   | 33.8%        |       |
| <b>New Risk Group*</b>                                |      |               |      |               |      |             |      |              |      |              |       |
| Low Risk 1                                            | 467  | 27.7%         | 360  | 27.9%         | 41   | 33.6%       | 42   | 30.9%        | 24   | 25.3%        | 0.443 |
| Low Risk 2                                            | 667  | 39.6%         | 547  | 42.3%         | 35   | 28.7%       | 52   | 38.2%        | 33   | 34.7%        | 0.015 |
| High                                                  | 551  | 32.7%         | 385  | 29.8%         | 46   | 37.7%       | 42   | 30.9%        | 38   | 40.0%        | 0.071 |
| <b>Age</b>                                            |      |               |      |               |      |             |      |              |      |              |       |
| Median (range)                                        | 9.4  | (0 - 29.5)    | 9.8  | (0.02 - 29.5) | 9.6  | (0 - 26.3)  | 6.1  | (0.2 - 22.2) | 10.4 | (0.6 - 19.6) | 0.001 |
| <b>WBC <math>\times 10^3</math> <math>\mu</math>L</b> |      |               |      |               |      |             |      |              |      |              |       |
| Median (range)                                        | 19.9 | (0.2 - 918.5) | 19.9 | (0.2 - 918.5) | 22.8 | (0.9 - 446) | 16.7 | (1.5 - 550)  | 24.2 | (1.1 - 400)  | 0.252 |
| <b>Bone Marrow Blasts %</b>                           |      |               |      |               |      |             |      |              |      |              |       |
| Median (range)                                        | 67   | (0 - 100)     | 67   | (0 - 100)     | 65   | (3.6 - 97)  | 67.5 | (2.8 - 98)   | 68   | (3 - 99)     | 0.778 |
| <b>Peripheral blasts (%)</b>                          |      |               |      |               |      |             |      |              |      |              |       |
| Median (range)                                        | 35   | (0 - 100)     | 35   | (0 - 99)      | 33   | (0 - 98)    | 30   | (0 - 98)     | 46   | (0 - 100)    | 0.254 |

\*Based on risk group definition in AAML1831 (using FLT3/ITD, FLT3/AM, mutations, cytogenetics and MRD). ANC, absolute neutrophil count; EO11, End of induction I; GO, Gemtuzumab ozogamicin; MRD, minimal residual disease; WBC, white blood cells

Table S2: Multivariable analysis for overall survival (OS), disease free survival (DFS), and relapse risk (RR) from end of induction I

|                                              | OS from EO11 |      |             |                  | DFS from EO11 |             |                  | RR from EO11 |             |                  |
|----------------------------------------------|--------------|------|-------------|------------------|---------------|-------------|------------------|--------------|-------------|------------------|
|                                              | N            | HR   | 95% CI      | p                | HR            | 95% CI      | p                | HR           | 95% CI      | p                |
| ANC/PLT recovery groups^                     |              |      |             |                  |               |             |                  |              |             |                  |
| Both platelet and ANC recovery (CR)          | 1154         | 1    |             |                  | 1             |             |                  | 1            |             |                  |
| Platelet recovery only ( $\geq 50$ cells/uL) | 127          | 1.14 | 0.83 - 1.58 | 0.421            | 1.27          | 0.98 - 1.65 | 0.073            | 1.24         | 0.93 - 1.67 | 0.150            |
| ANC recovery only ( $> 500$ cells/uL; CRp)   | 109          | 0.89 | 0.60 - 1.31 | 0.545            | 0.92          | 0.68 - 1.25 | 0.586            | 0.93         | 0.66 - 1.30 | 0.655            |
| Neither platelet nor ANC recovery            | 80           | 1.06 | 0.72 - 1.55 | 0.766            | 1.14          | 0.83 - 1.55 | 0.418            | 1.14         | 0.82 - 1.58 | 0.443            |
| Study/Treatment Arm                          |              |      |             |                  |               |             |                  |              |             |                  |
| AAML0531 Arm A or AAML1031 Arms A/B          | 1108         | 1    |             |                  | 1             |             |                  | 1            |             |                  |
| AAML0531 Arm B (GO)                          | 305          | 0.81 | 0.65 - 1.03 | 0.081            | 0.80          | 0.66 - 0.97 | <b>0.021</b>     | 0.74         | 0.60 - 0.91 | <b>0.005</b>     |
| AAML1031 Arm C (Sorafenib)                   | 57           | 0.57 | 0.34 - 0.97 | <b>0.040</b>     | 0.45          | 0.28 - 0.72 | <b>0.001</b>     | 0.31         | 0.18 - 0.55 | <b>&lt;0.001</b> |
| WBC Count                                    |              |      |             |                  |               |             |                  |              |             |                  |
| $< 100,00/\mu\text{L}$                       | 1207         | 1    |             |                  | 1             |             |                  | 1            |             |                  |
| $\geq 100,00/\mu\text{L}$                    | 263          | 1.26 | 0.99 - 1.60 | 0.056            | 1.42          | 1.18 - 1.72 | <b>&lt;0.001</b> | 1.55         | 1.25 - 1.92 | <b>&lt;0.001</b> |
| Race                                         |              |      |             |                  |               |             |                  |              |             |                  |
| Non-African American                         | 1291         | 1    |             |                  | 1             |             |                  | 1            |             |                  |
| African American                             | 179          | 1.31 | 1.00 - 1.72 | 0.051            | 1.05          | 0.84 - 1.33 | 0.655            | 0.96         | 0.75 - 1.24 | 0.757            |
| New Risk Group*                              |              |      |             |                  |               |             |                  |              |             |                  |
| Low Risk 1                                   | 413          | 1    |             |                  | 1             |             |                  | 1            |             |                  |
| Low Risk 2                                   | 592          | 2.64 | 1.90 - 3.68 | <b>&lt;0.001</b> | 2.03          | 1.62 - 2.54 | <b>&lt;0.001</b> | 2.31         | 1.82 - 2.93 | <b>&lt;0.001</b> |
| High                                         | 465          | 6.88 | 4.95 - 9.55 | <b>&lt;0.001</b> | 4.33          | 3.42 - 5.47 | <b>&lt;0.001</b> | 4.86         | 3.78 - 6.24 | <b>&lt;0.001</b> |
| HSCT in CR <sup>‡</sup>                      | 234          | 0.85 | 0.65 - 1.11 | 0.233            | 0.70          | 0.55 - 0.90 | <b>0.005</b>     | 0.52         | 0.39 - 0.69 | <b>&lt;0.001</b> |

ANC, absolute neutrophil count; CI, confidence interval; CR, complete response; CRp, complete response with incomplete platelet recovery; DFS, disease free survival; EOI1, end of induction 1; HR, hazard ratio; OS, overall survival; PLT, platelet; RR, relapse risk; HSCT, hematopoietic stem cell transplant; WBC, white blood cell

<sup>^</sup>CR defined as <5% residual marrow disease by flow cytometry, peripheral ANC of  $\geq 500$  cells/ $\mu$ L and a platelet count of  $\geq 50,000$  cells/ $\mu$ L for 7 days without transfusion

<sup>\*</sup>Based on risk group definition in AAML1831 (using FLT3/ITD, FLT3/AM, mutations, cytogenetics and MRD)

<sup>†</sup>Time dependent variable

n=175 patients are unknown for either WBC or Race and are excluded from MV analyses above

n=51 patients on AAML1031 have unknown SCT in CR status therefore they are censored at the start time of follow-up period when SCT was received

**Table S3: Multivariable analysis for overall survival (OS), disease free survival (DFS), and relapse risk (RR) from end of induction I by study treatment arm**

|                                                 | OS from EOI1 |      |             |       | DFS from EOI1 |             |       | RR from EOI1 |             |       |
|-------------------------------------------------|--------------|------|-------------|-------|---------------|-------------|-------|--------------|-------------|-------|
|                                                 | N            | HR   | 95% CI      | p     | HR            | 95% CI      | p     | HR           | 95% CI      | p     |
| <b>AAML0531 Arm A or AAML1031 Arms A/B only</b> |              |      |             |       |               |             |       |              |             |       |
| <b>ANC/PLT recovery groups<sup>^</sup></b>      |              |      |             |       |               |             |       |              |             |       |
| Both platelet and ANC recovery (CR)             | 870          | 1    |             |       | 1             |             |       | 1            |             |       |
| Platelet recovery only ( $\geq 50$ cells/uL)    | 100          | 1.18 | 0.81 - 1.71 | 0.398 | 1.35          | 1.01 - 1.82 | 0.043 | 1.27         | 0.91 - 1.78 | 0.165 |
| ANC recovery only ( $>500$ cells/uL; CRp)       | 82           | 0.89 | 0.57 - 1.38 | 0.595 | 0.88          | 0.62 - 1.25 | 0.476 | 0.86         | 0.58 - 1.27 | 0.439 |
| Neither platelet nor ANC recovery               | 56           | 0.81 | 0.50 - 1.33 | 0.413 | 1.05          | 0.72 - 1.52 | 0.806 | 1.09         | 0.74 - 1.58 | 0.671 |
| <b>AAML0531 Arm B (GO) only</b>                 |              |      |             |       |               |             |       |              |             |       |
| <b>ANC/PLT recovery groups<sup>^</sup></b>      |              |      |             |       |               |             |       |              |             |       |
| Both platelet and ANC recovery (CR)             | 246          | 1    |             |       | 1             |             |       | 1            |             |       |
| Platelet recovery only ( $\geq 50$ cells/uL)    | 22           | 1.13 | 0.54 - 2.37 | 0.741 | 0.98          | 0.51 - 1.88 | 0.946 | 0.95         | 0.48 - 1.88 | 0.877 |
| ANC recovery only ( $>500$ cells/uL; CRp)       | 22           | 1.05 | 0.45 - 2.42 | 0.917 | 1.30          | 0.70 - 2.44 | 0.409 | 1.45         | 0.75 - 2.78 | 0.266 |
| Neither platelet nor ANC recovery               | 15           | 1.18 | 0.51 - 2.75 | 0.694 | 0.99          | 0.48 - 2.06 | 0.988 | 0.99         | 0.45 - 2.21 | 0.988 |

ANC, absolute neutrophil count; CI, confidence interval; CR, complete response; CRp, complete response with incomplete platelet recovery; DFS, disease free survival; EO1, end of induction 1; HR, hazard ratio; OS, overall survival; PLT, platelet; RR, relapse risk

<sup>a</sup>CR defined as <5% residual marrow disease by flow cytometry, peripheral ANC of  $\geq 500$  cells/ $\mu$ L and a platelet count of  $\geq 50,000$  cells/ $\mu$ L for 7 days without transfusion
